# Supplementary material for: Gene Methylation and Cytological Atypia in Random Fine-Needle Aspirates for Assessment of Breast Cancer Risk
Source: Oxford University Press journal article supplement (doi:10.1158/1940-6207.capr-15-0377), 2016-06-03
Supplement: 19406207capr150377-sup-157409_2_supp_3502842_57fwn5.docx [file 19406207capr150377-sup-157409_2_supp_3502842_57fwn5.docx]

**Supplemental Tables**

Gene Methylation and Cytological Atypia in Random Fine Needle Aspirates for Assessment of Breast Cancer Risk

Vered Stearns, Mary Jo Fackler, Sidra Hafeez, Zoila Lopez Bujanda, Robert T. Chatterton, Lisa K. Jacobs1 Nagi F. Khouri, David Ivancic, Kara Kenney, Christina Shehata, Stacie C. Jeter, Judith A. Wolfman, Carola Zalles, Peng Huang, Seema A. Khan,Saraswati Sukumar

Supplementary Tables:

Table S1 page 1

Table S2 page 1

Table S3 page 2

Table S4 page 2

Table S5 page 3

Table S6 page 3

Table S7 page 4

Table S8 page 5

Table S9 page 5

**Supplementary Tables.**

**Table S4: Association between DNA methylation and lifetime Gail risk score – multivariate analysis**

| **Multi-variate analysis** | | | |
| --- | --- | --- | --- |
| **Gene** | **Coefficient** | **Std. Error** | **P-value** |
| *AKR1B1* | -0.003 | 0.008 | 0.711 |
| *TM6SF1* | 0.001 | 0.010 | 0.955 |
| *CCND2* | 0.000 | 0.011 | 0.984 |
| *RARB* | -0.009 | 0.012 | 0.459 |
| *RASSF1* | -0.002 | 0.011 | 0.880 |
| *TWIST1* | -0.032 | 0.017 | 0.055 |
| *TMEFF2* | -0.006 | 0.011 | 0.584 |
| HIN1 | -0.008 | 0.011 | 0.452 |
| CMI | -0.024 | 0.015 | 0.112 |
| Adjusted for age, BMI, total cell counts,and log(percent density) | | | |

**Table S6 Association between Methylation and Masood Cytology Score**

|  | **Multivariate Analysis** | | |
| --- | --- | --- | --- |
| **Gene** | **Coefficient** | **Std. Error** | **P-value*** |
|
| *AKR1B1* | 0.007 | 0.003 | 0.018 |
| *TM6SF1* | 0.009 | 0.004 | 0.022 |
| *CCND2* | 0.032 | 0.004 | 0.000 |
| *RARB* | -0.008 | 0.005 | 0.108 |
| *RASSF1* | 0.023 | 0.004 | 0.000 |
| *TWIST1* | 0.023 | 0.006 | 0.000 |
| *TMEFF2* | 0.003 | 0.004 | 0.526 |
| HIN1 | 0.014 | 0.004 | 0.001 |
| CMI | 0.030 | 0.006 | 0.000 |
| *Adjusted for age, BMI, total cell counts, log (percent density), log (Gail score). Significant at P<0.006, after Bonferroni adjustment for multiple comparisons of individual genes. | | | |

| **Table S9 Agreement between the baseline and the 6-month methylation levels in rFNA among individuals (n = 15)** | | |
| --- | --- | --- |
|  |  | |
| **Gene** | **Cohen's kappa coefficient** | **95% confidence interval** |
|
| *AKR1B1* | 0.216 | (-0.702, 0.269) |
| *TM6SF1* | 0.571 | (0.145, 0.998) |
| *CCND2* | 0.464 | (0.015, 0.913) |
| *RARB* | 0.196 | (-0.300, 0.693) |
| *RASSF1* | 0.464 | (0.015, 0.913) |
| *TWIST1* | 0.324 | (-0.153, 0.801) |
| HIN1 | 0.182 | (-0.300, 0.664) |
| CMI | 0.196 | (-0.300, 0.693) |
